# Supplementary material
Source: PubMed Central journal article supplement (PMC5678981)
Supplement: NIHMS898687-supplement-2.pdf [file NIHMS898687-supplement-2.pdf]

**Supplementary Table 1: Quantitative RT-PCR primers**

|                    |         |                            |
|--------------------|---------|----------------------------|
| <i>Il17a</i> Int 1 | forward | ACATGAGTGCCGACAAACAACGGGT  |
|                    | reverse | AGTCAGTGGGCTGCTGAATGACCCC  |
| <i>Il23r</i> Pro   | forward | GCATTTGCTTCAGGCTTTTACCTATG |
|                    | reverse | GGCAGCTCACTTTAGTAATCTGGG   |
| <i>Bcl2l1</i>      | forward | TCAGAGCAAAAAGCAAGAGCA      |
|                    | reverse | GAGGAGGAGGGACGTTTTGT       |
| 2310007L24Rik      | forward | AAACCAAGTCACCCCAGCTT       |
|                    | reverse | ATGGGGTTTCCCAGACTACC       |
| <i>Hbb</i>         | forward | GCTCTGGGTACTCCCTCTGA       |
|                    | reverse | GCAAATGTGTTGCCAAAAAG       |
| <i>il17a</i>       | forward | TTTAACTCCCTTGGCGCAAAA      |
|                    | reverse | CTTTCCTCCGCATTGACAC        |
| <i>Ifng</i>        | forward | ATGAACGCTACACACTGCATC      |
|                    | reverse | CCATCCTTTTGCCAGTTCCTC      |
| <i>Csf2</i>        | forward | GGCCTTGGAAGCATGTAGAGG      |
|                    | reverse | GGAGAACTCGTTAGAGACGACTT    |
| <i>Il3</i>         | forward | GGGATACCCACCGTTTAACCA      |

|              |         |                         |
|--------------|---------|-------------------------|
|              | reverse | AGGTTTACTCTCCGAAAGCTCTT |
| <i>Il1rn</i> | forward | GCTCATTGCTGGGTACTTACAA  |
|              | reverse | CCAGACTTGGCACAAGACAGG   |
| <i>Lrmp</i>  | forward | TTTGGACGTGACAAGAGGGTG   |
|              | reverse | ACTCTGGTCCTCGTTCATTCTG  |
| <i>Gzmb</i>  | forward | CCACTCTCGACCCTACATGG    |
|              | reverse | GGCCCCAAAGTGACATTTATT   |
| <i>Il9</i>   | forward | ATGTTGGTGACATACATCCTTGC |
|              | reverse | TGACGGTGGATCATCCTTCAG   |
| <i>Il10</i>  | forward | GCTCTTACTGACTGGCATGAG   |
|              | reverse | CGCAGCTCTAGGAGCATGTG    |
| <i>Maf</i>   | forward | GGAGACCGACCGCATCATC     |
|              | reverse | TCATCCAGTAGTAGTCTTCCAGG |
| <i>Il22</i>  | forward | ATGAGTTTTTCCCTTATGGGGAC |
|              | reverse | GCTGGAAGTTGGACACCTCAA   |
| <i>Ccl4</i>  | forward | TTCCTGCTGTTTCTTACACCT   |
|              | reverse | CTGTCTGCCTCTTTTGGTCAG   |

|               |         |                          |
|---------------|---------|--------------------------|
| <i>Ccl5</i>   | forward | GCTGCTTTGCCTACCTCTCC     |
|               | reverse | TCGAGTGACAAACACGACTGC    |
| <i>Casp1</i>  | forward | ACAAGGCACGGGACCTATG      |
|               | reverse | TCCCAGTCAGTCCTGGAAATG    |
| <i>Ccl3</i>   | forward | TTCTCTGTACCATGACACTCTGC  |
|               | reverse | CGTGGAATCTTCCGGCTGTAG    |
| <i>Icos</i>   | forward | ATGAAGCCGTA CTTCTGCCAT   |
|               | reverse | CGCATTTTTAACTGCTGGACAG   |
| <i>I17r</i>   | forward | GCGGACGATCACTCCTTCTG     |
|               | reverse | AGCCCCACATATTTGAAATTCCA  |
| <i>Stat4</i>  | forward | TGGCAACAATTCTGCTTCAA AAC |
|               | reverse | GAGGTCCTGGATAGGCATGT     |
| <i>Lagls3</i> | forward | AGACAGCTTTTCGCTTAACGA    |
|               | reverse | GGGTAGGCACTAGGAGGAGC     |
| <i>Lag3</i>   | forward | CTGGGACTGCTTTGGGAAG      |
|               | reverse | GGTTGATGTTGCCAGATAACCC   |
| <i>I16st</i>  | forward | CCGTGTGGTTACATCTACCCT    |

|              |         |                         |
|--------------|---------|-------------------------|
|              | reverse | CGTGGTTCTGTTGATGACAGTG  |
| <i>lkzf3</i> | forward | CTGAATGACTACAGCTTGCCC   |
|              | reverse | GCTCCGGCTTCATAATGTTCT   |
| <i>ll4</i>   | forward | GGTCTCAACCCCCAGCTAGT    |
|              | reverse | GCCGATGATCTCTCTCAAGTGAT |
